# Supplementary material for: The role of Sphingomyelin synthase 2 (SMS2) in platelet activation and its clinical significance
Source: Springer Nature journal article supplement (doi:10.1186/s12959-021-00282-x), 2021-04-28

**A**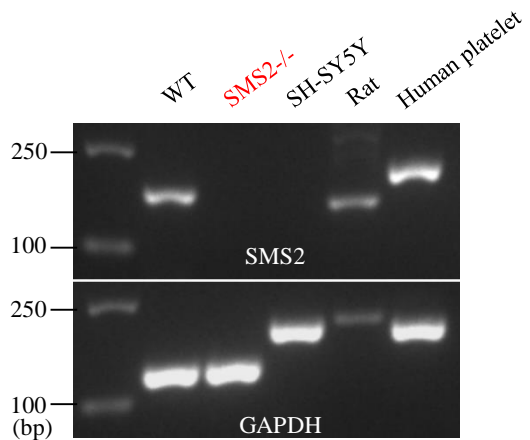**B**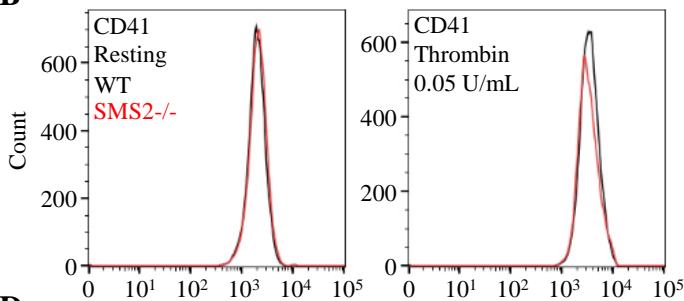**D**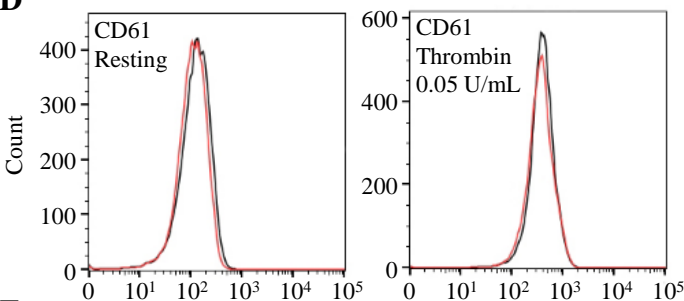**F**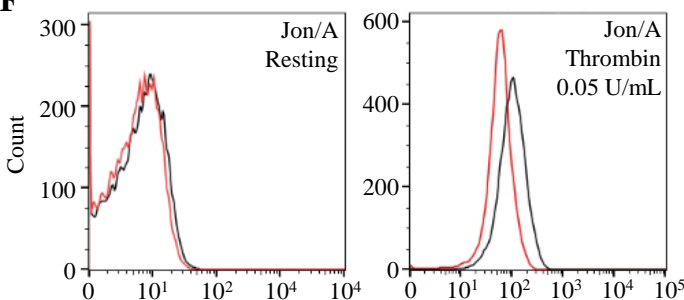**H**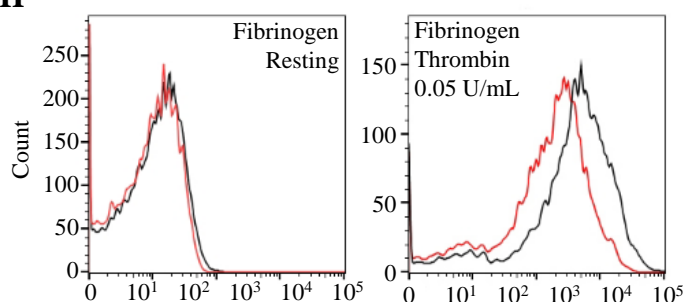

## Supplementary Figure 1

**C**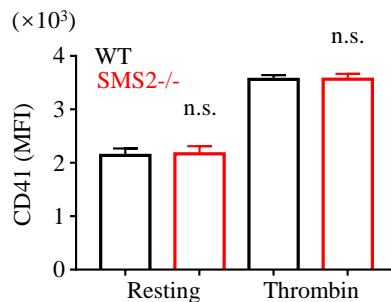**E**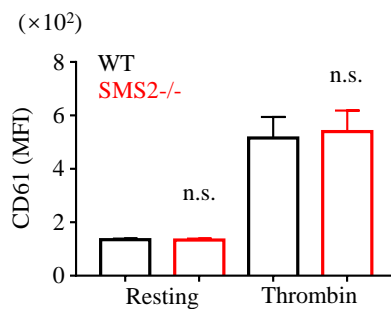**G**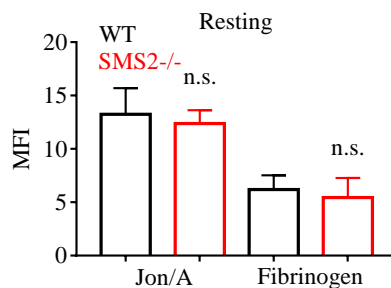**I**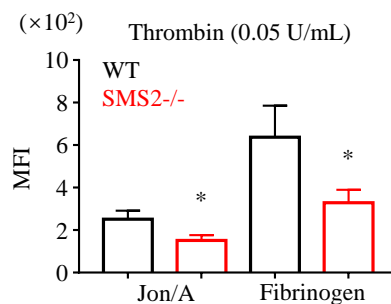

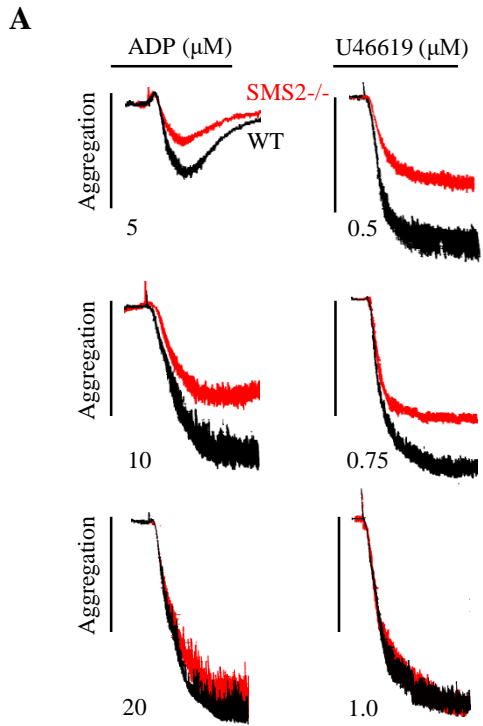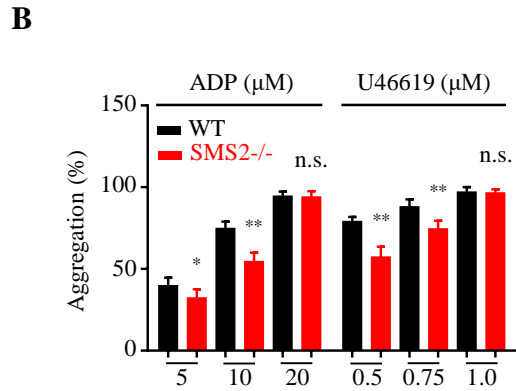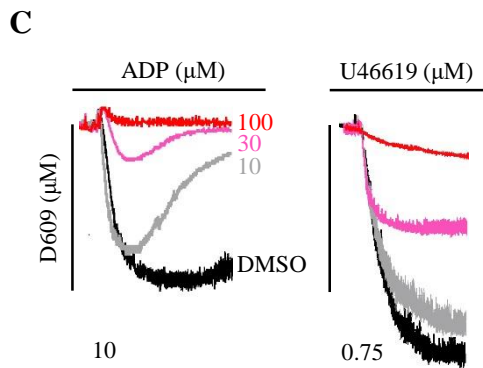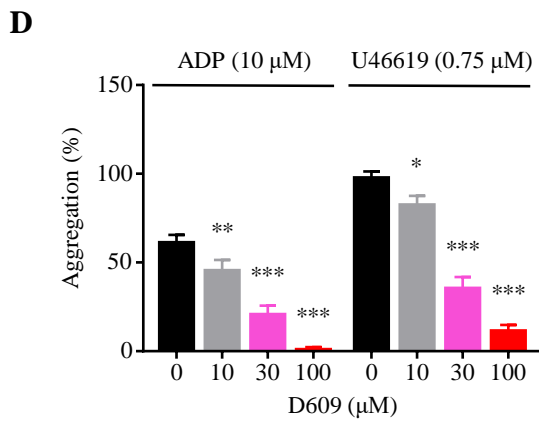

**A**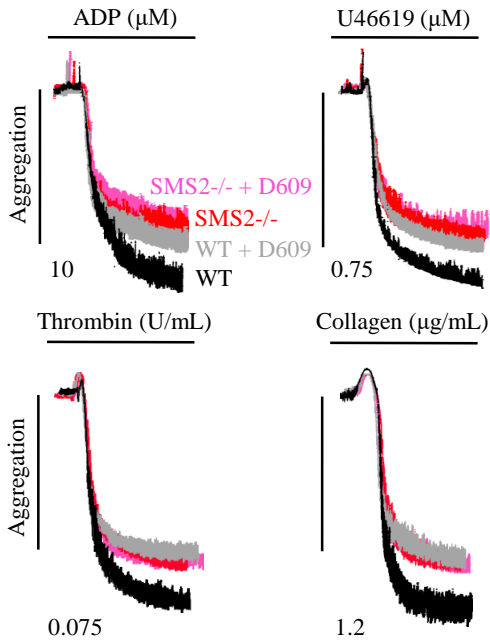**B**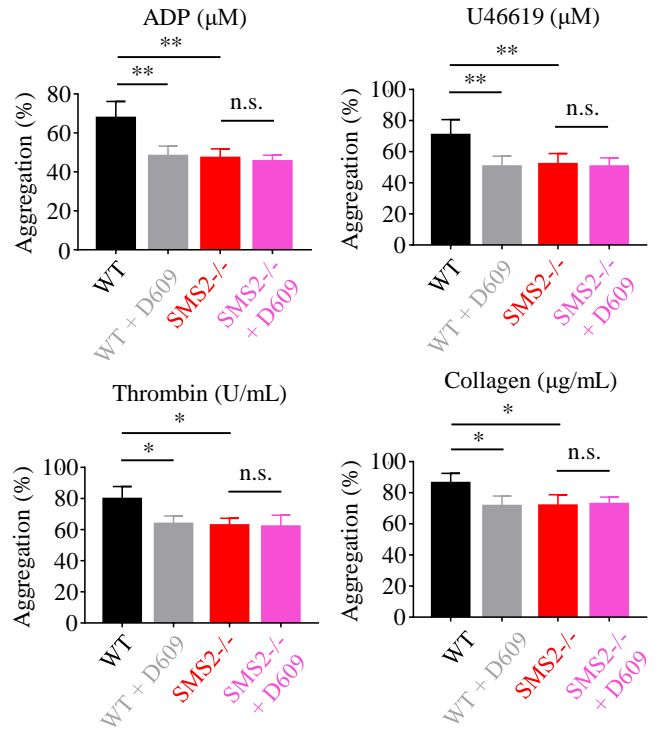

**A**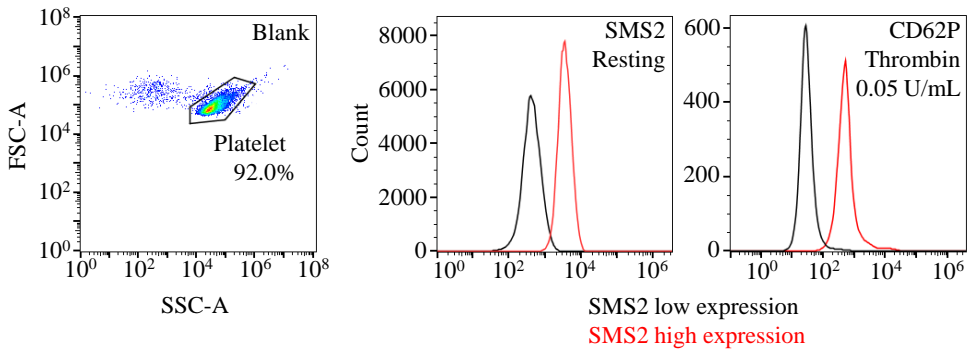**B**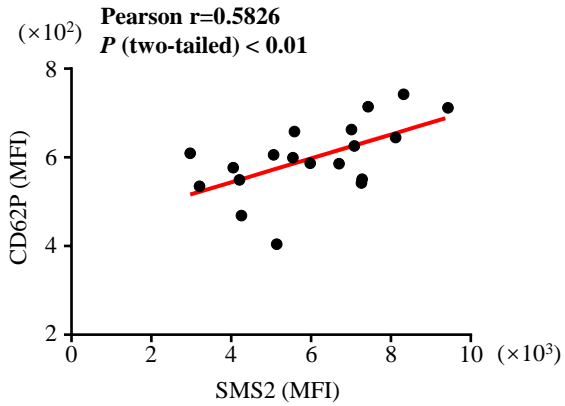

Supplement: MOESM1 [file 19114478]
